# Supplementary material for: Cytotoxicity Effect of Quinoin, Type 1 Ribosome-Inactivating Protein from Quinoa Seeds, on Glioblastoma Cells
Source: MDPI journal article supplement (doi:10.3390/toxins13100684), 2021-09-25
Supplement: s1 [file s1]

## Article

# Cytotoxicity Effect of Quinoin, Type 1 Ribosome-Inactivating Protein from Quinoa Seeds, on Glioblastoma Cells

Rossella Rotondo <sup>1,†</sup>, Sara Ragucci <sup>2,†</sup>, Salvatore Castaldo <sup>1</sup>, Maria Antonietta Oliva <sup>1</sup>, Nicola Landi <sup>2</sup>, Paolo V. Pedone <sup>2</sup>, Antonietta Arcella <sup>1,\*‡</sup> and Antimo Di Maro <sup>2,‡</sup>

<sup>1</sup> INM IRCCS Istituto Neurologico Mediterraneo NEUROMED, Via Atinense 18, 86077 Pozzilli, Italy; rossellaross1988@gmail.com (R.R.); castaldosal90@gmail.com (S.C.); mariaantonietta.oliva@neuromed.it (M.A.O.)

<sup>2</sup> Department of Environmental, Biological and Pharmaceutical Sciences and Technologies (DiSTABiF), University of Campania “Luigi Vanvitelli”, Via Vivaldi 43, 81100 Caserta, Italy; sara.ragucci@unicampania.it (S.R.); nicola.landi@unicampania.it (N.L.); paolovincenzo.pedone@unicampania.it (P.V.P.); antimo.dimaro@unicampania.it (A.D.M.)

\* Correspondence: arcella@neuromed.it

† These authors contributed equally to this work.

‡ These authors share equal senior authorship.

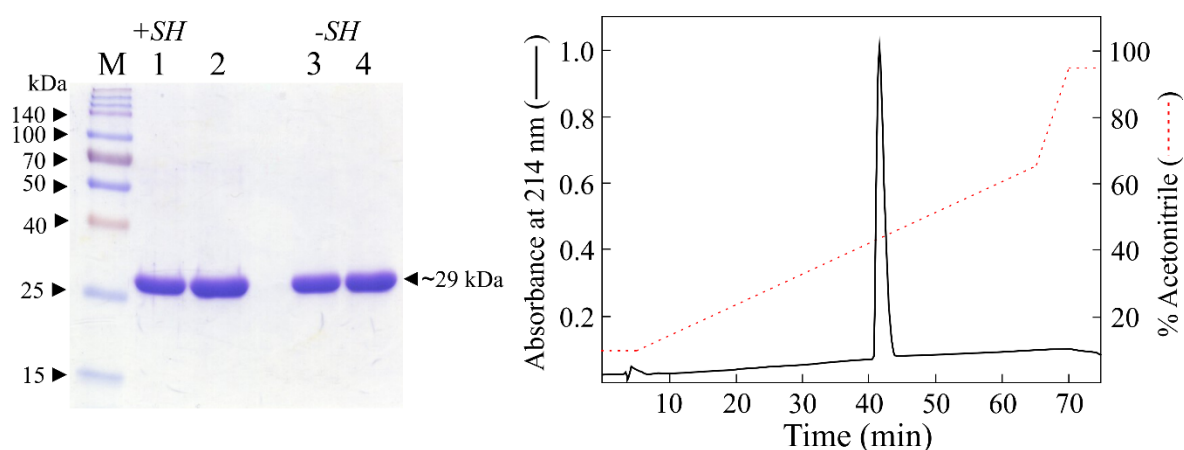

**Figure S1.** (A) SDS-PAGE analysis of the purified quinoin with or without  $\beta$ -Mercaptoethanol (lanes 1-2 and 3-4; 3.0 and 6.0  $\mu$ g, respectively; M, protein markers). SDS-PAGE was carried out in 12% polyacrylamide separating gel. (B) Elution profile of purified quinoin by RP-HPLC. Quinoin (100  $\mu$ g) was separated on a C4 column (Phenomenex, 0.46x25 cm), using a Waters Breeze HPLC system. The elution system contained 0.1% trifluoroacetic acid (TFA) in H<sub>2</sub>O (solvent A) and 0.1% TFA in acetonitrile (solvent B). A gradient elution system was applied from 5% to 65% of solvent B in 60 minutes at a flow rate of 1 mL/min.

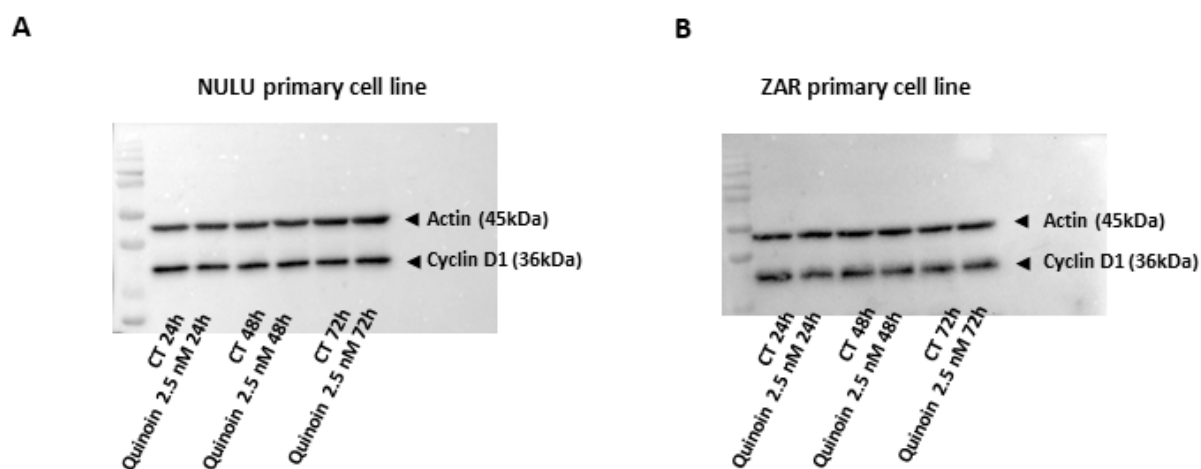

**Figure S2.** Western Blot analysis of Cyclin D1 in primary glioblastoma cell lines NULU (A) and ZAR (B) treated with Quinoin 2.5 nM for 24, 48 and 72 h.

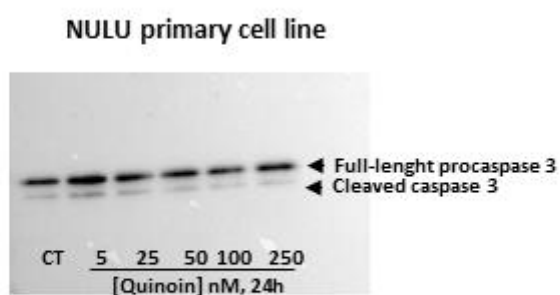

**Figure S3.** Western Blot analysis of Caspase 3 in primary glioblastoma cells NULU treated with Quinoin 5, 25, 50, 100 and 250 nM for 24 h. The blot revealed the presence of activated form of caspase 3.
